# Supplementary material for: Engineered Hybrid Vesicles and Cellular Internalization in Mammary Cancer Cells
Source: Pharmaceutics. 2024 Mar 22;16(4):440. doi: 10.3390/pharmaceutics16040440 (PMC11054022; doi:10.3390/pharmaceutics16040440)
Supplement: Supplementary file 1 [file pharmaceutics-16-00440-s001.zip › pharmaceutics-2854951-supplementary.pdf]

**Supplementary Table S1. Size, polydispersity index, zeta potential values of EVs**

|     | Size (nm)         | Polydispersity index (PDI) | Zeta potential value ( $\zeta$ , mV) | Protein amount ( $\mu\text{g}$ ) |
|-----|-------------------|----------------------------|--------------------------------------|----------------------------------|
| EVs | 189.53 $\pm$ 7.27 | 0.37 $\pm$ 0.02            | -18.33 $\pm$ 0.52                    | 20.87 $\pm$ 0.01                 |

**Supplementary Table S2. Physicochemical properties of liposome and HVs with DOX**

| Formulation | Formulation of Composition <sup>1</sup> | Size (nm)         | Polydispersity index (PDI) | Zeta potential value ( $\zeta$ , mV) |
|-------------|-----------------------------------------|-------------------|----------------------------|--------------------------------------|
| F1          | Liposome                                | 130.73 $\pm$ 0.41 | 0.10 $\pm$ 0.00            | -2.91 $\pm$ 0.11                     |
| F2          | Lipo:EV (10:1)                          | 133.6 $\pm$ 0.31  | 0.10 $\pm$ 0.01            | -2.92 $\pm$ 0.18                     |
| F3          | Lipo:EV (5:1)                           | 120.53 $\pm$ 0.55 | 0.13 $\pm$ 0.01            | -6.23 $\pm$ 0.36                     |
| F4          | Lipo:EV (2:1)                           | 123.57 $\pm$ 0.38 | 0.14 $\pm$ 0.00            | -8.15 $\pm$ 0.05                     |

<sup>1</sup>Weight ratio of composition in vesicles (w:w), \*\*\* $p < 0.001$

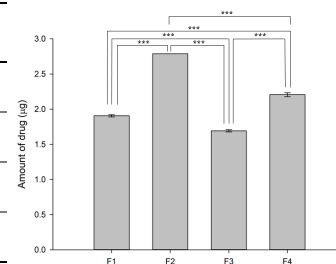

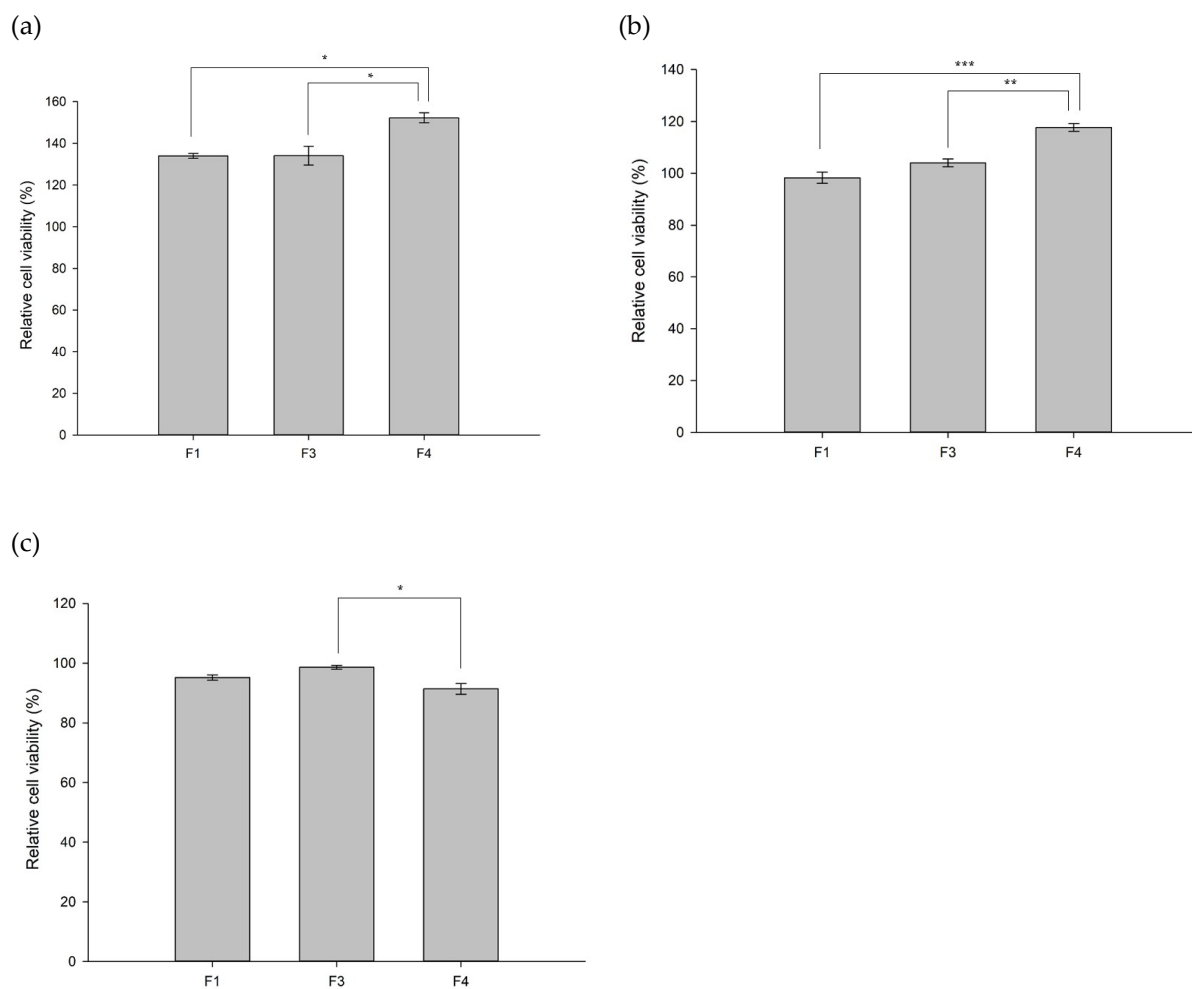

**Figure S1.** Cell viability of HVs without DOX in (a) MCF-7, (b) MDA-MB-231, (c) MDA-MB-468 cells for 24 h. (\* $p < 0.05$ , \*\* $p < 0.01$ , and \*\*\* $p < 0.001$ )

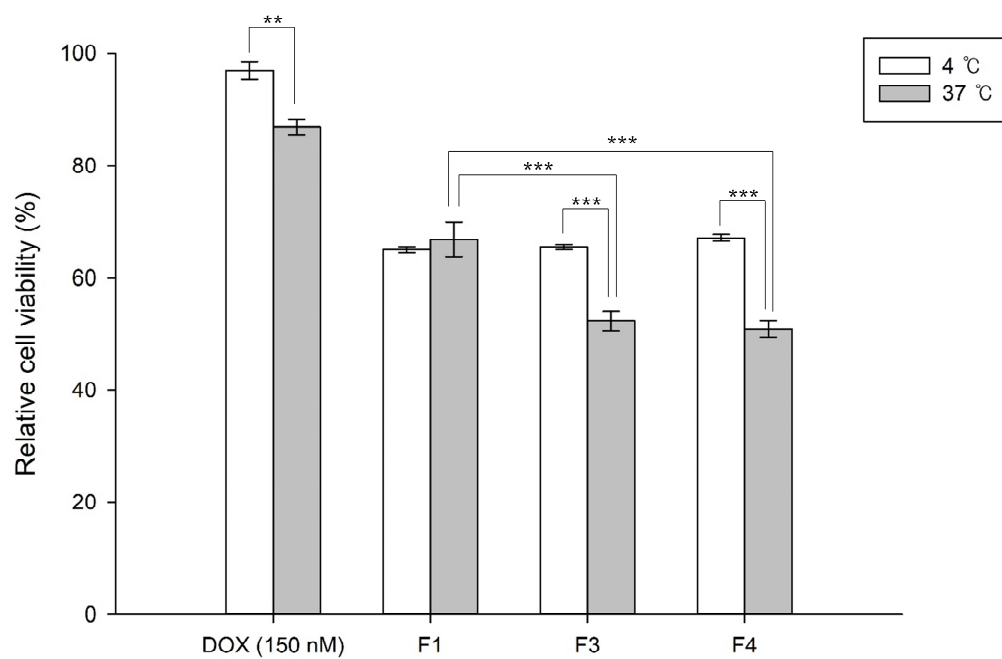

**Figure S2.** Cell toxicity of HVs with DOX in MCF-7 for 4 h at 4°C and 37°C. (\*\* $p < 0.01$ , and \*\*\* $p < 0.001$ )

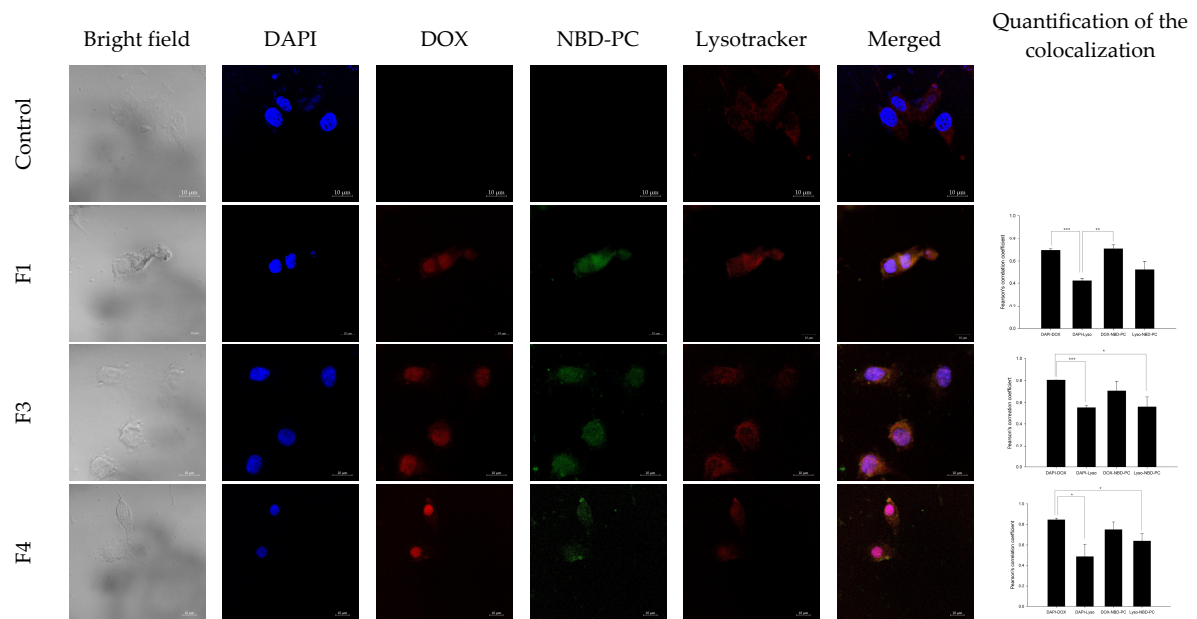

**Figure S3a.** Cellular uptake of F1, F3, and F4 in MCF-7. For trafficking of DOX (red)-loaded formulations, the following dyes were used: DAPI (blue) for nuclei, NBD-PC (green) for lipid vesicles such as liposomes and HVs, and LysoTracker (Deep Red) for late endosomes/early lysosomes. Scale bar is 10  $\mu$ m. Colocalization was quantitatively analyzed using Pearson's correlation coefficients using the Image J version 1.53e program between DAPI and DOX (DAPI-DOX), DAPI and LysoTracker (DAPI-Lyso), between DOX and NBD-PC (DOX-NBD-PC) and LysoTracker and NBD-PC (Lyso-NBD-PC), respectively. (\*  $p < 0.05$ , \*\*  $p < 0.01$ , and \*\*\*  $p < 0.001$ ).

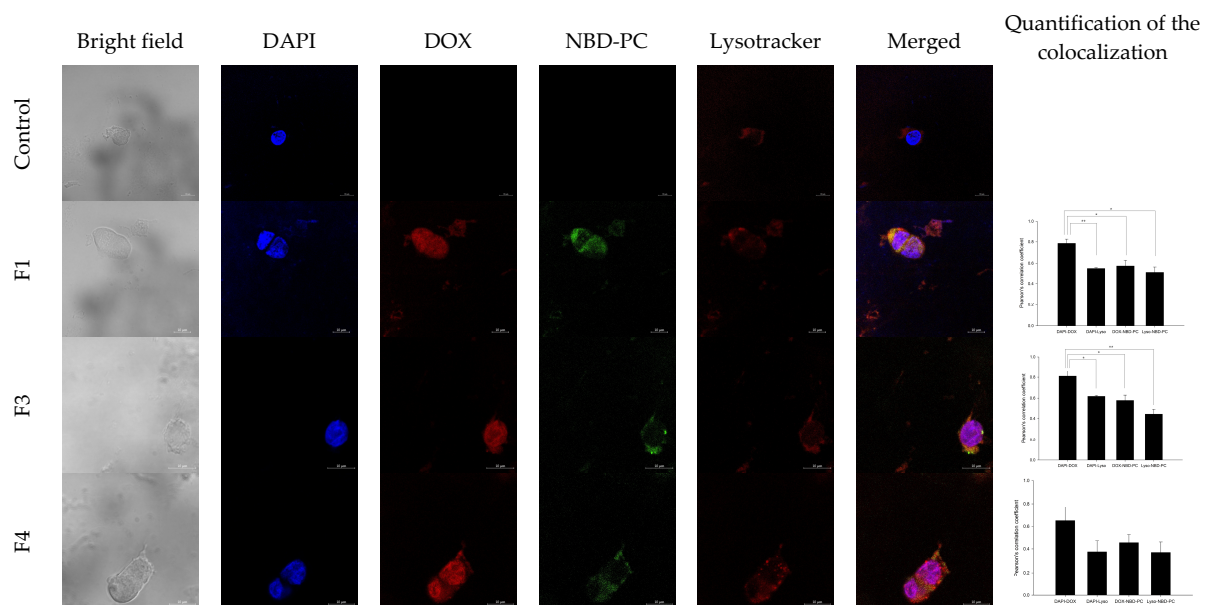

**Figure S3b.** Cellular uptake of F1, F3, and F4 in MDA-MB-231. For trafficking of DOX (red)-loaded formulations, the following dyes were used: DAPI (blue) for nuclei, NBD-PC (green) for lipid vesicles such as liposomes and HVs, and LysoTracker (Deep Red) for late endosomes/early lysosomes. Scale bar is 10  $\mu$ m. Colocalization was quantitatively analyzed using Pearson's correlation coefficients using the ImageJ version 1.53e program between DAPI and DOX (DAPI-DOX), DAPI and LysoTracker (DAPI-Lyso), DOX and NBD-PC (DOX-NBD-PC), and LysoTracker and NBD-PC (Lyso-NBD-PC), respectively. (\*  $p < 0.05$ , and \*\*  $p < 0.01$ ).

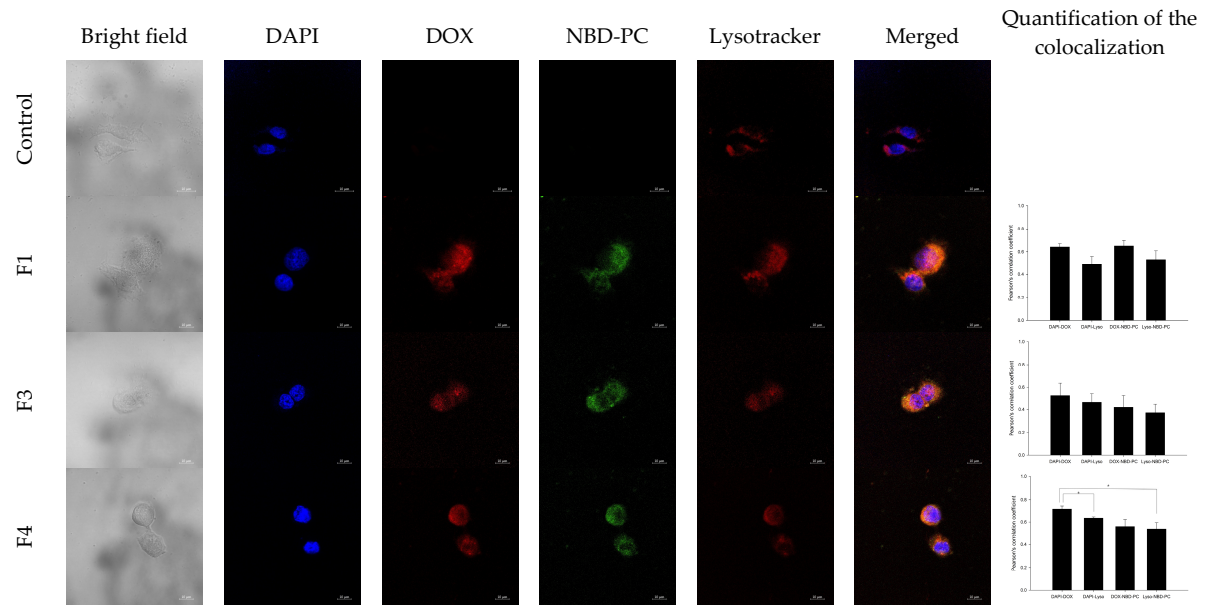

**Figure S3c.** Cellular uptake of F1, F3, and F4 in MDA-MB-468. For trafficking of DOX (red)-loaded formulations, the following dyes were used: DAPI (blue) for nuclei, NBD-PC (green) for lipid vesicles such as liposomes and HVs, and LysoTracker (Deep Red) for late endosomes/early lysosomes. Scale bar is 10  $\mu\text{m}$ . Colocalization was quantitatively analyzed using Pearson's correlation coefficients using the ImageJ version 1.53e program between DAPI and DOX (DAPI-DOX), DAPI and LysoTracker (DAPI-Lyso), DOX and NBD-PC (DOX-NBD-PC), and LysoTracker and NBD-PC (Lyso-NBD-PC), respectively. (\*  $p < 0.05$ ).

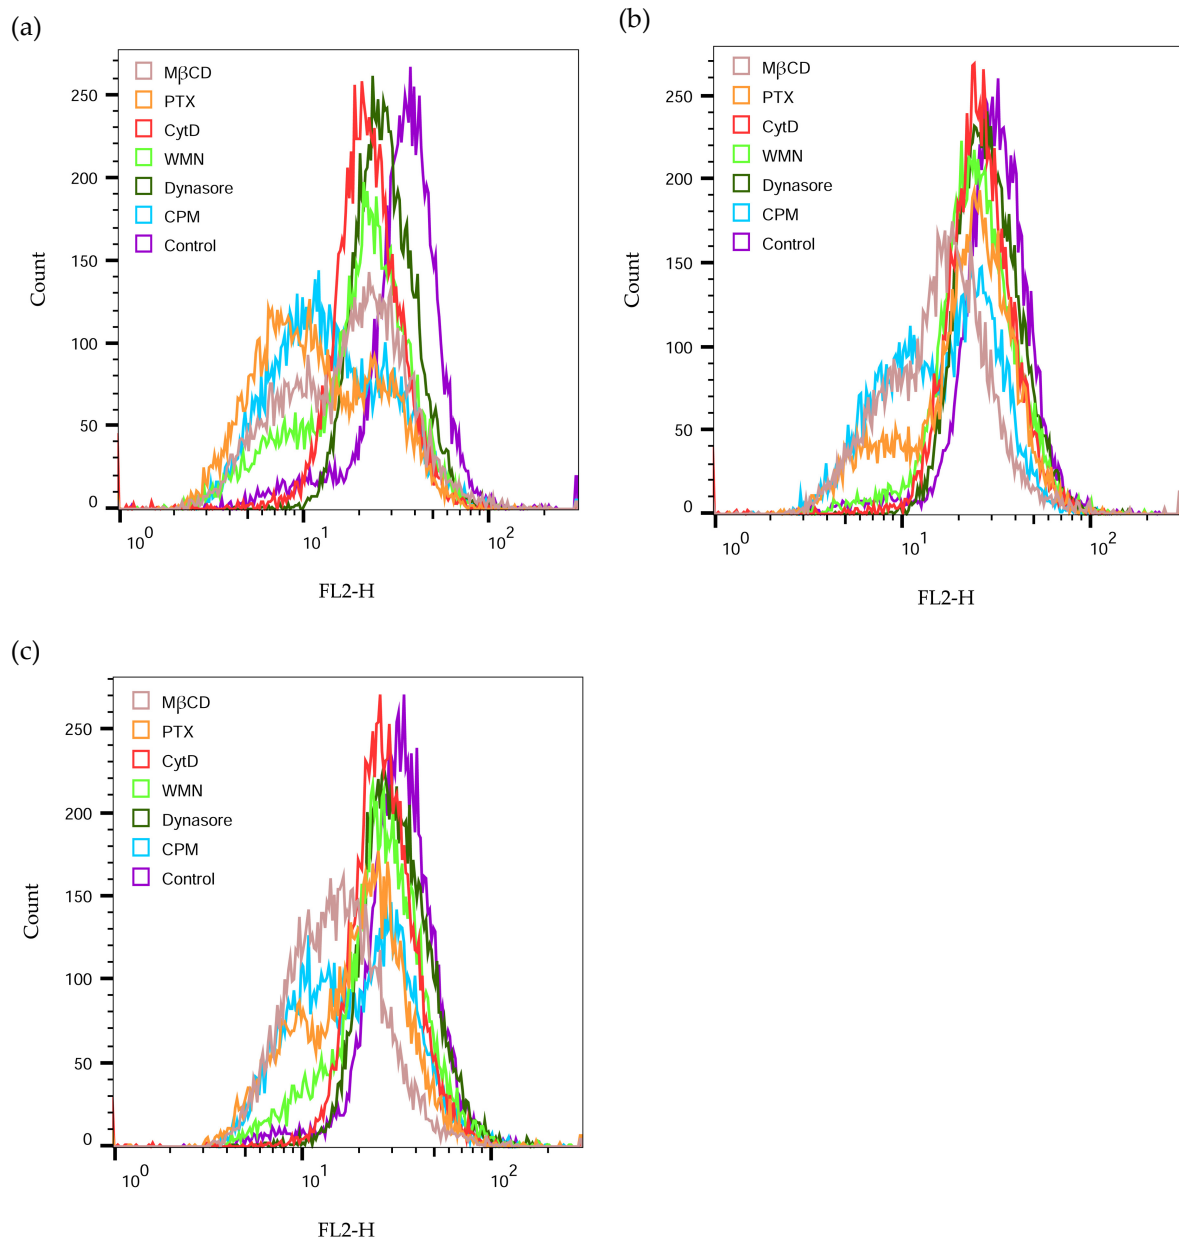

**Figure S4a.** Flow cytometry analysis for cellular uptake with endocytosis inhibitors of (a) F1, (b) F3, (c) F4 in MCF-7.

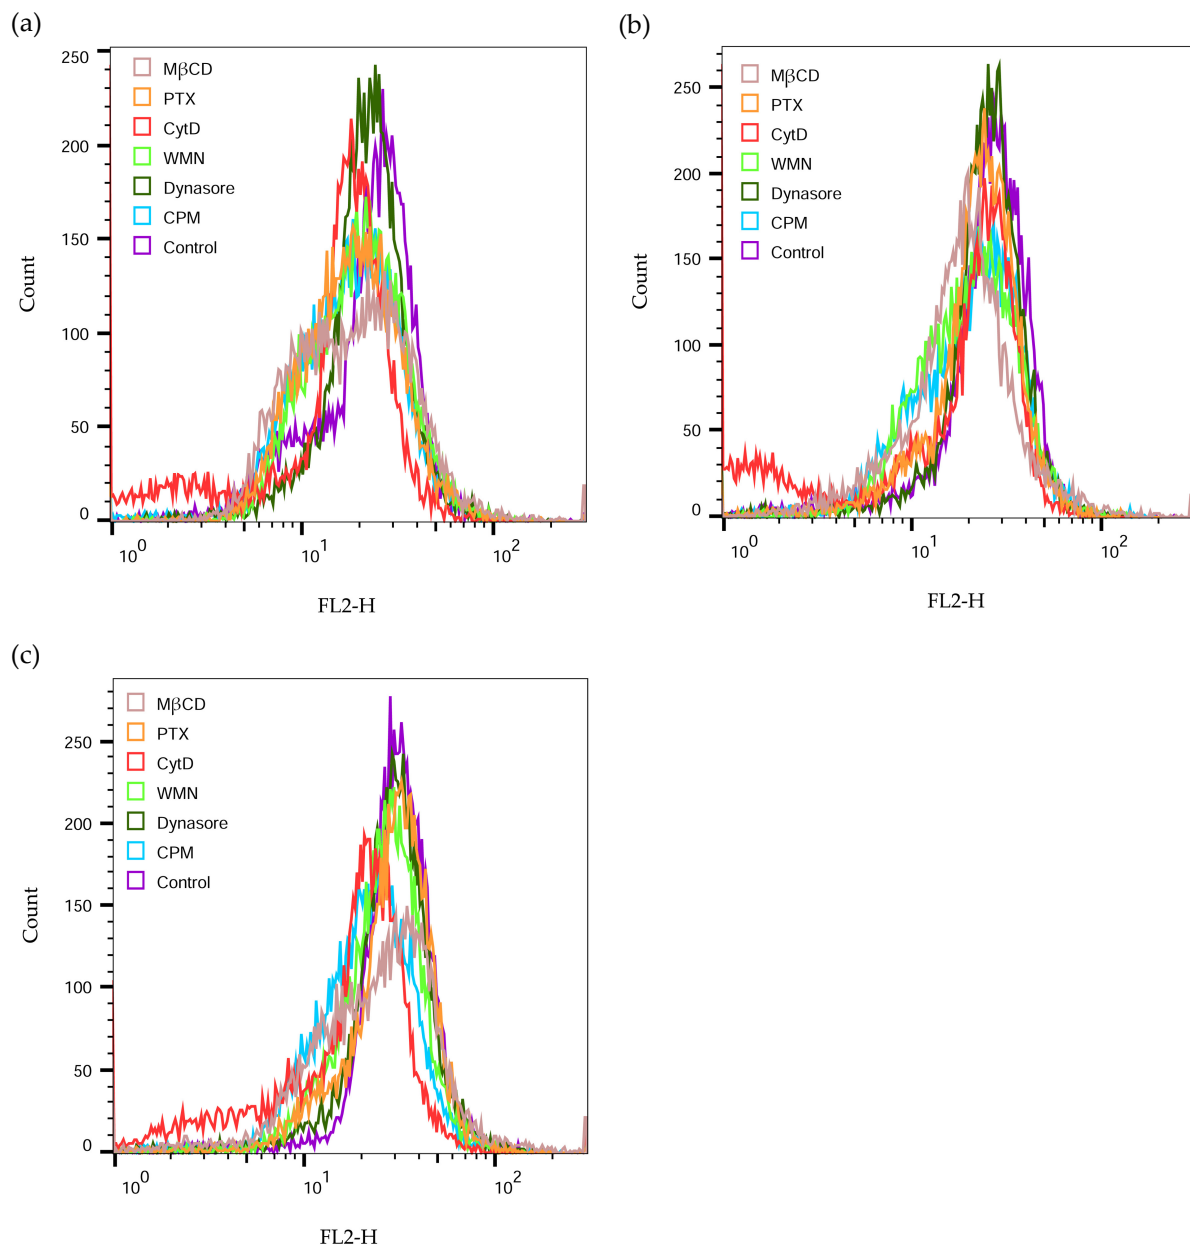

**Figure S4b.** Flow cytometry analysis for cellular uptake with endocytosis inhibitors of (a) F1, (b) F3, (c) F4 in MDA-MB-231.

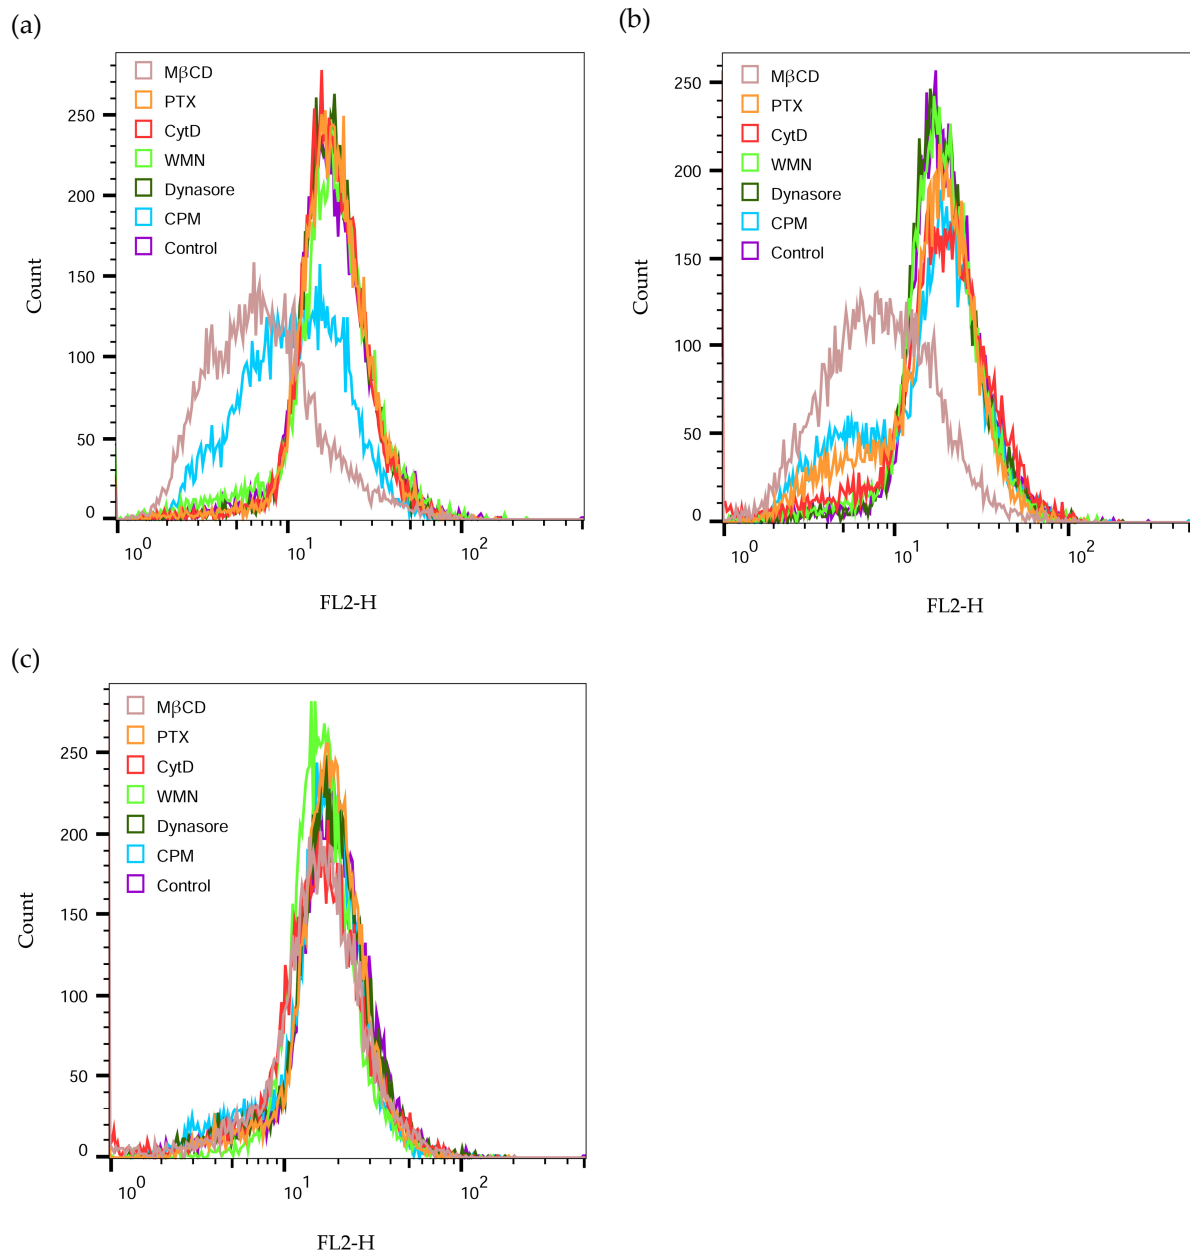

**Figure S4c.** Flow cytometry analysis for cellular uptake with endocytosis inhibitors of (a) F1, (b) F3, (c) F4 in MDA-MB-468.
